# Supplementary material for: Aberrant Water Structure Dynamics in B16 Melanoma-Bearing Mice by Time Domain Refractometry Analysis
Source: MDPI journal article supplement (doi:10.3390/biology12091250), 2023-09-18
Supplement: s1 [file 20230726 Supplemental Materials.pdf › 20230726 Supplemental Materials.pdf]

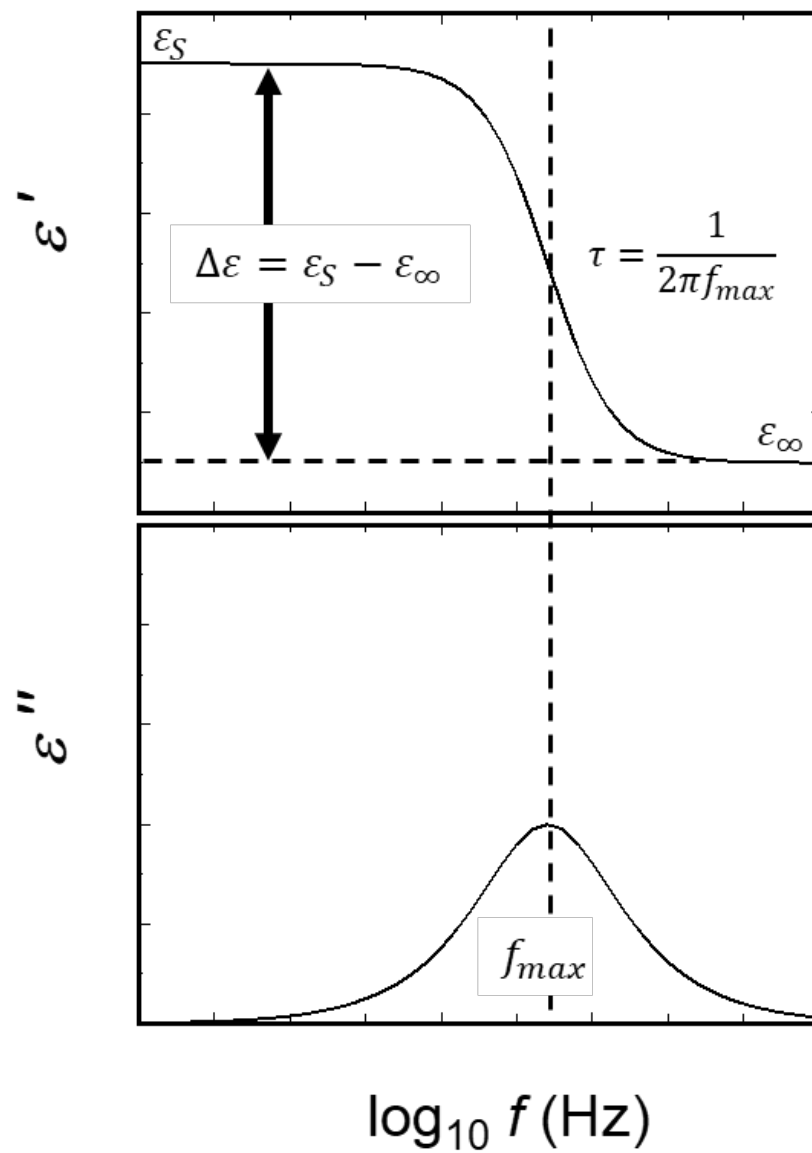

**Figure S1.** The frequency dependency of complex permittivity presented by the Debye formula. Relaxation time ( $\tau$ ) is given by  $\tau = 1/2\pi f_{max}$ .  $f_{max}$  indicates specific peak frequency.

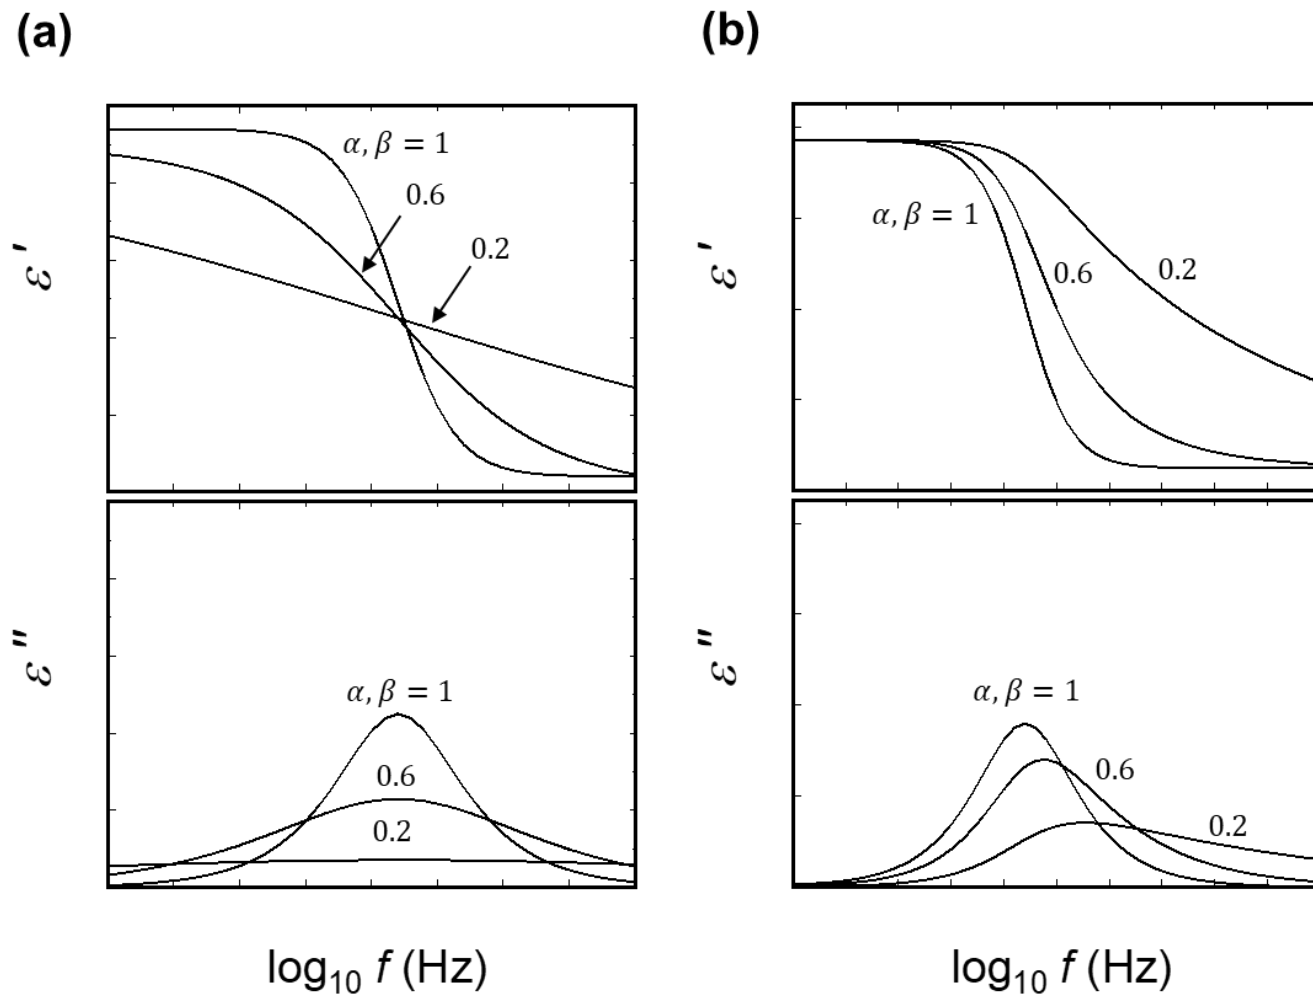

**Figure S2. The function given by the curve fitting analysis of dielectric relaxation measurement.**

(a) The frequency dependency of complex permittivity presented by the Cole-Cole formula. The distribution of relaxation time distribution parameter ( $\beta$ ) shows a symmetrical distribution, ranging from  $>0$  to  $\leq 1$ . The closer to 1, the more uniform the structure. (b) The frequency dependency of complex permittivity presented by the Davidson-Cole formula. The distribution of relaxation time dispersion is presented by asymmetrical distribution ( $\alpha$ ) and symmetrical distribution ( $\beta$ ): both distributions ranged between  $>0$  and  $\leq 1$ . The closer to 1 at  $\beta$ , the more uniform the structure.

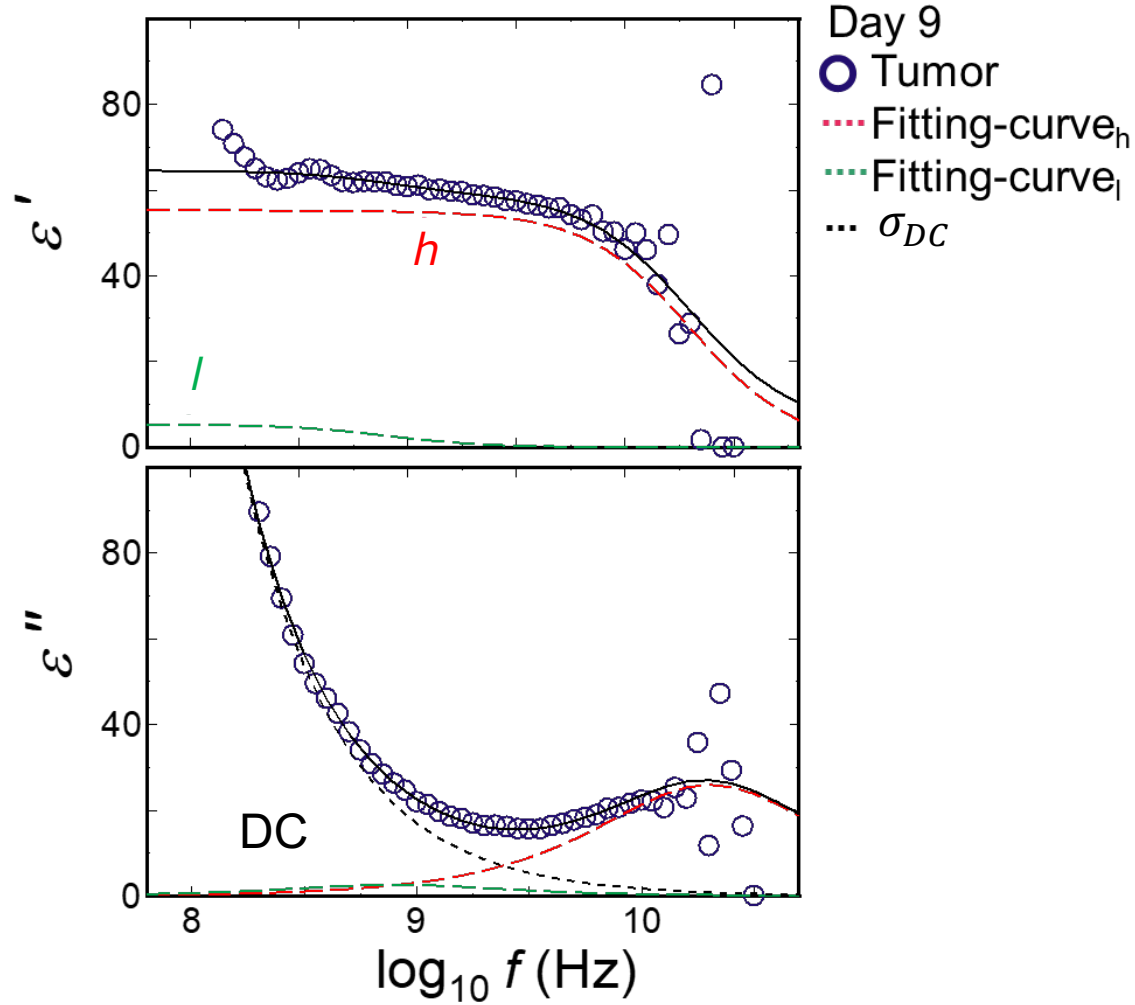

**Figure S3. Curve fitting analysis of tumor tissues.**

The relaxation curve was divided into the lower and higher frequency processes ( $l$  and  $h$ ) on tumor tissues on day 9. The relaxation parameters,  $\tau$ ,  $\beta$ , and  $\Delta\epsilon$  for  $l$ - and  $h$ -processes were determined by curve fitting analysis using two Cole-Cole formulas with a contribution of the DC conductivity term. Then, DC indicates direct electrical conduction of *in vivo* macromolecules and ions derived from living organisms. The analysis was performed in the frequency range from 100 MHz to 30 GHz.

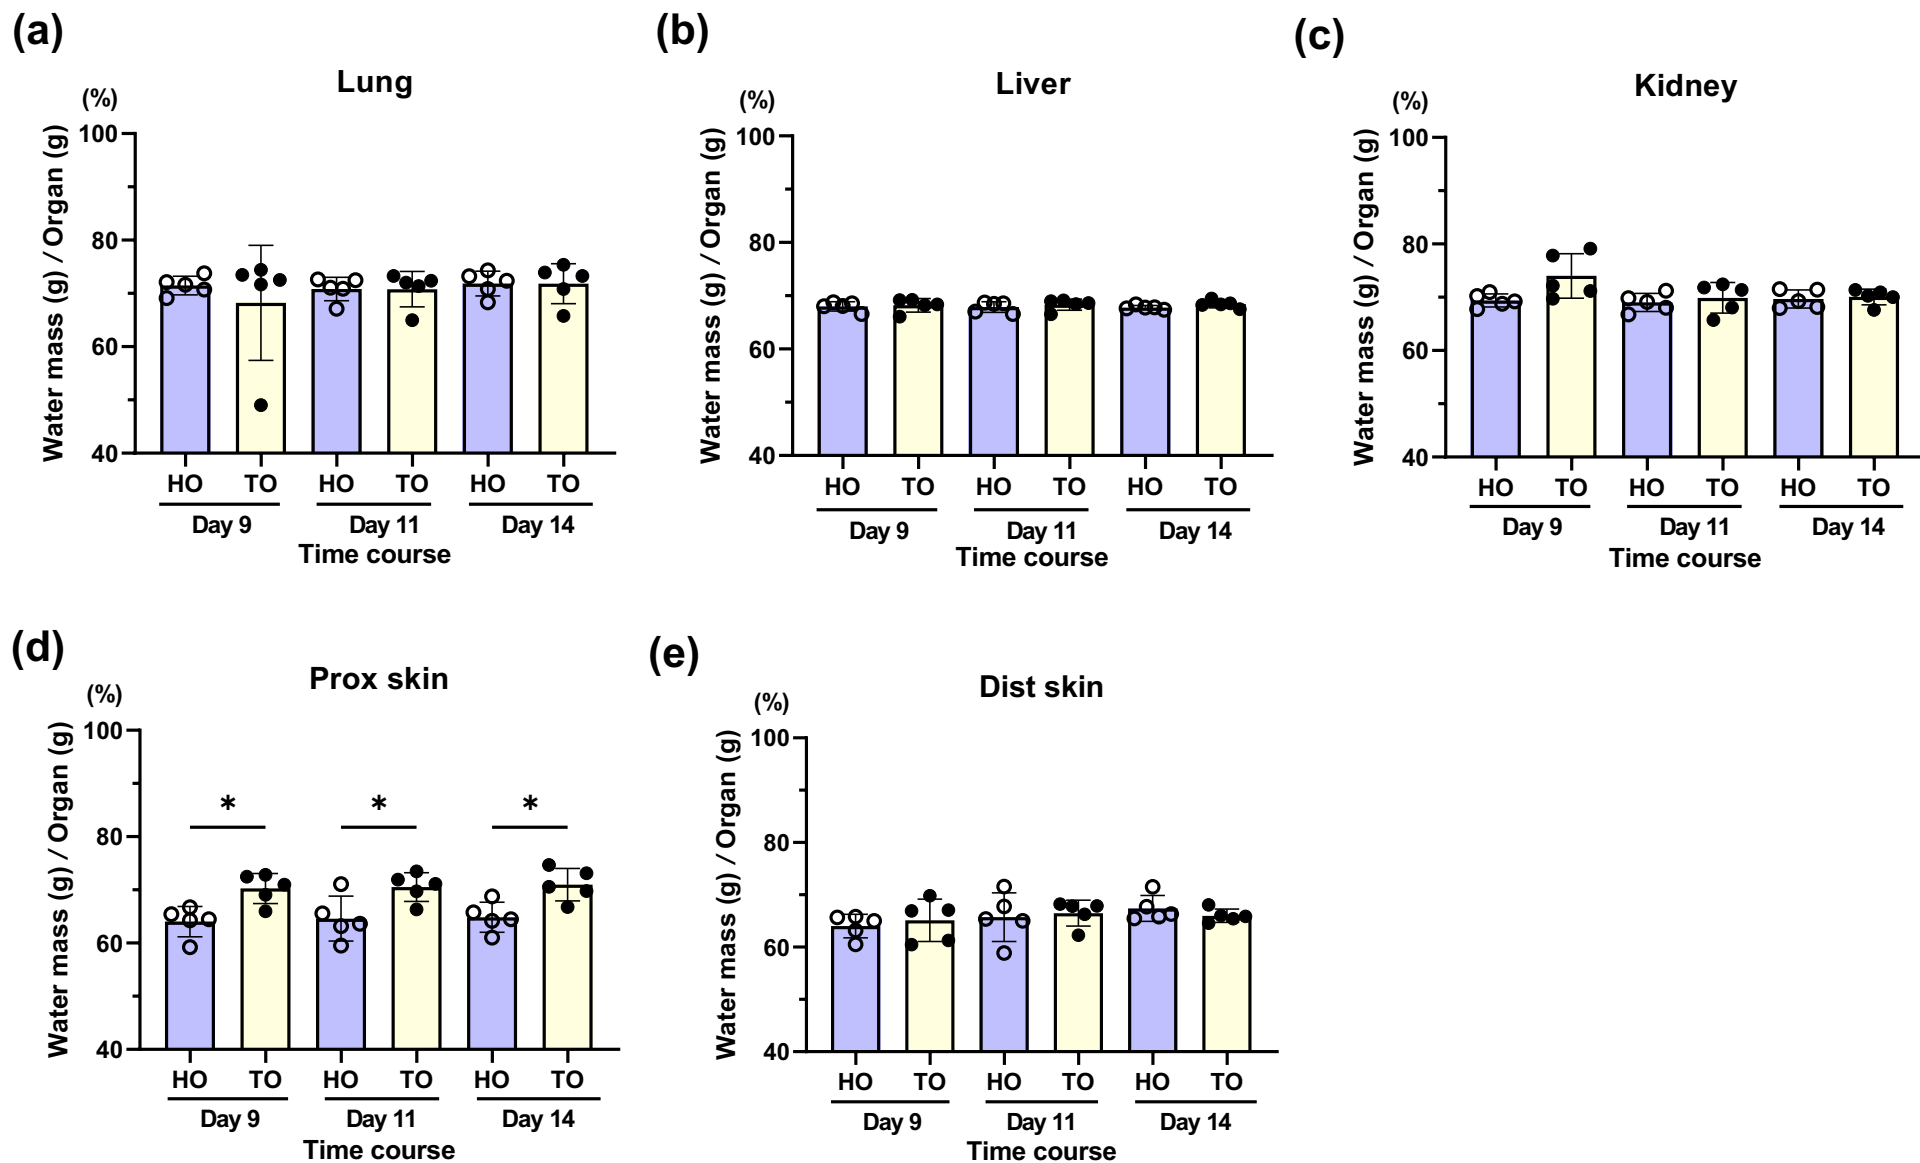

**Figure S4.** The water contents in each organ of healthy and tumor-bearing mice. The graphs are presented as mean  $\pm$  SD.  $n=5$  in HO or TO. \* $p < 0.05$ .

(a)

| Dielectric constant ( $\epsilon'$ ) at around 1GHz |        |        |       |       |           |           |
|----------------------------------------------------|--------|--------|-------|-------|-----------|-----------|
|                                                    |        | Kidney | Liver | Lung  | Dist skin | Prox skin |
| Online database                                    |        | 57.9   | 46.4  | 21.8  | 40.9      |           |
| Healthy organ                                      | day 9  | 40.49  | 46.52 | 24.24 | 22.81     | 26.01     |
|                                                    | day 11 | 39.55  | 36.6  | 24.52 | 35.74     | 26.85     |
|                                                    | day 14 | 39.79  | 46.18 | 28.33 | 25.67     | 22.18     |
| Tumor organ                                        | day 9  | 43.82  | 46.27 | 33.21 | 25.21     | 33.02     |
|                                                    | day 11 | 41.35  | 47.17 | 36.5  | 23.19     | 24.34     |
|                                                    | day 14 | 42.18  | 45.94 | 21.98 | 29.54     | 24.88     |

(b)

| Conductivity ( $\sigma_{DC}$ ) at around 1GHz |        |        |       |       |           |           |
|-----------------------------------------------|--------|--------|-------|-------|-----------|-----------|
|                                               |        | Kidney | Liver | Lung  | Dist skin | Prox skin |
| Online database                               |        | 1.450  | 0.897 | 0.474 | 0.900     |           |
| Healthy organ                                 | day 9  | 0.730  | 0.766 | 0.461 | 0.341     | 0.434     |
|                                               | day 11 | 0.827  | 0.750 | 0.534 | 0.748     | 0.509     |
|                                               | day 14 | 0.780  | 0.763 | 0.604 | 0.480     | 0.395     |
| Tumor organ                                   | day 9  | 0.892  | 0.834 | 0.715 | 0.439     | 0.627     |
|                                               | day 11 | 0.799  | 0.813 | 0.703 | 0.389     | 0.422     |
|                                               | day 14 | 0.842  | 0.786 | 0.428 | 0.565     | 0.481     |

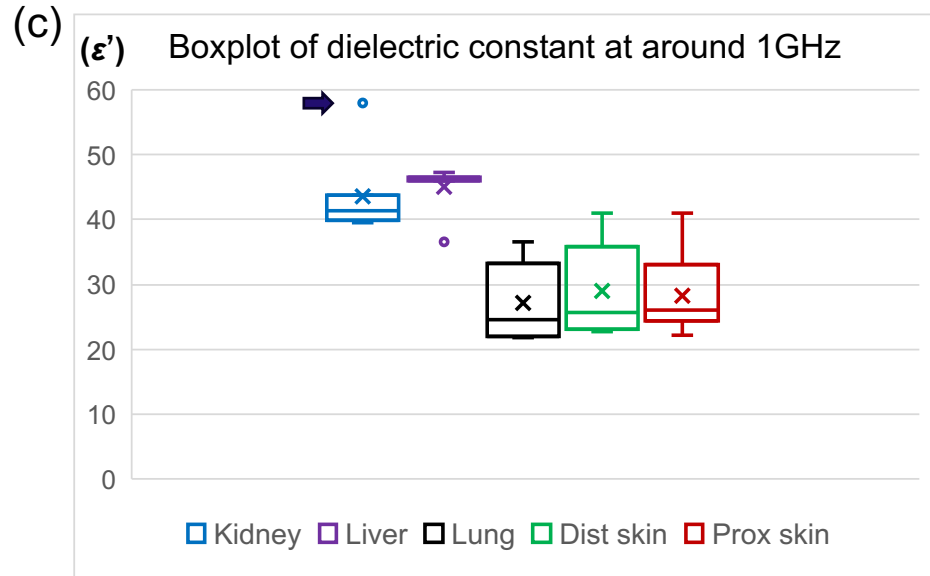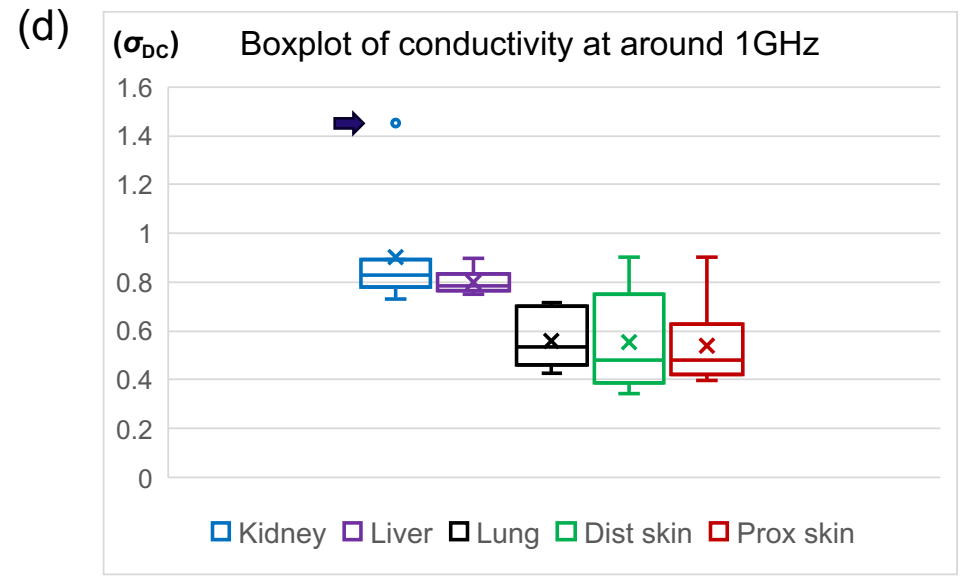

**Figure S5. The consistency of the dielectric constant and conductivity of the measured values to online human database in each organ.** The top tables indicate the values of dielectric constant (a) and conductivity (b) at around 1GHz in each organ of the present experiment and online database. The representative values in each of dielectric constant and conductivity in the present experiment are compared to those of online database. The bottom graphs (c, d) indicate the boxplots from the tables of dielectric constant (a) and conductivity (b) respectively. The boxplot graph of each organ is formed of the whole values of the present experiment and online database. In (c) and (d), the arrowheads indicate the outliers of online database.

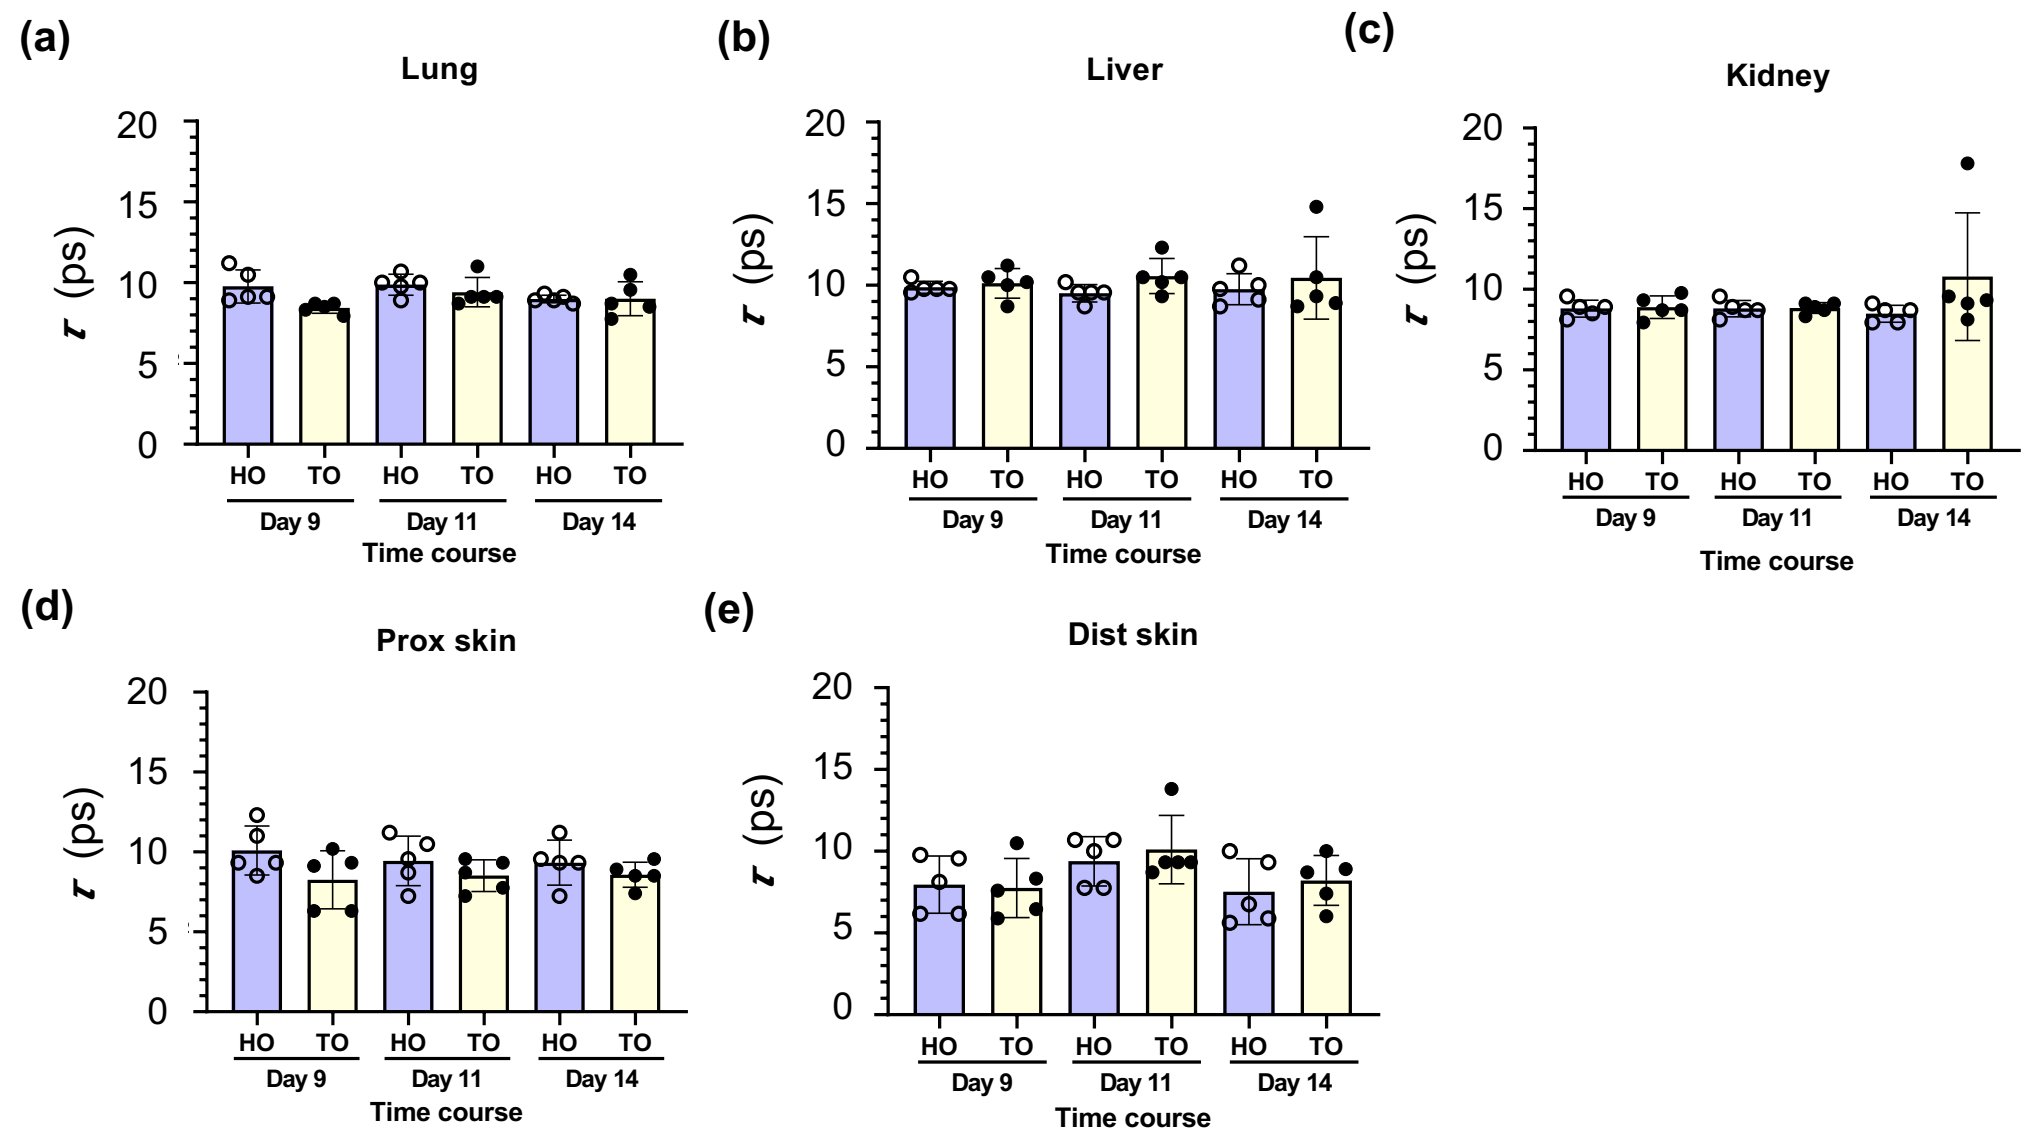

**Figure S6.** The relaxation time ( $\tau$ ) in each organ of healthy and tumor-bearing mice. The graphs are presented as mean  $\pm$  SD. n=5 in HO or TO.

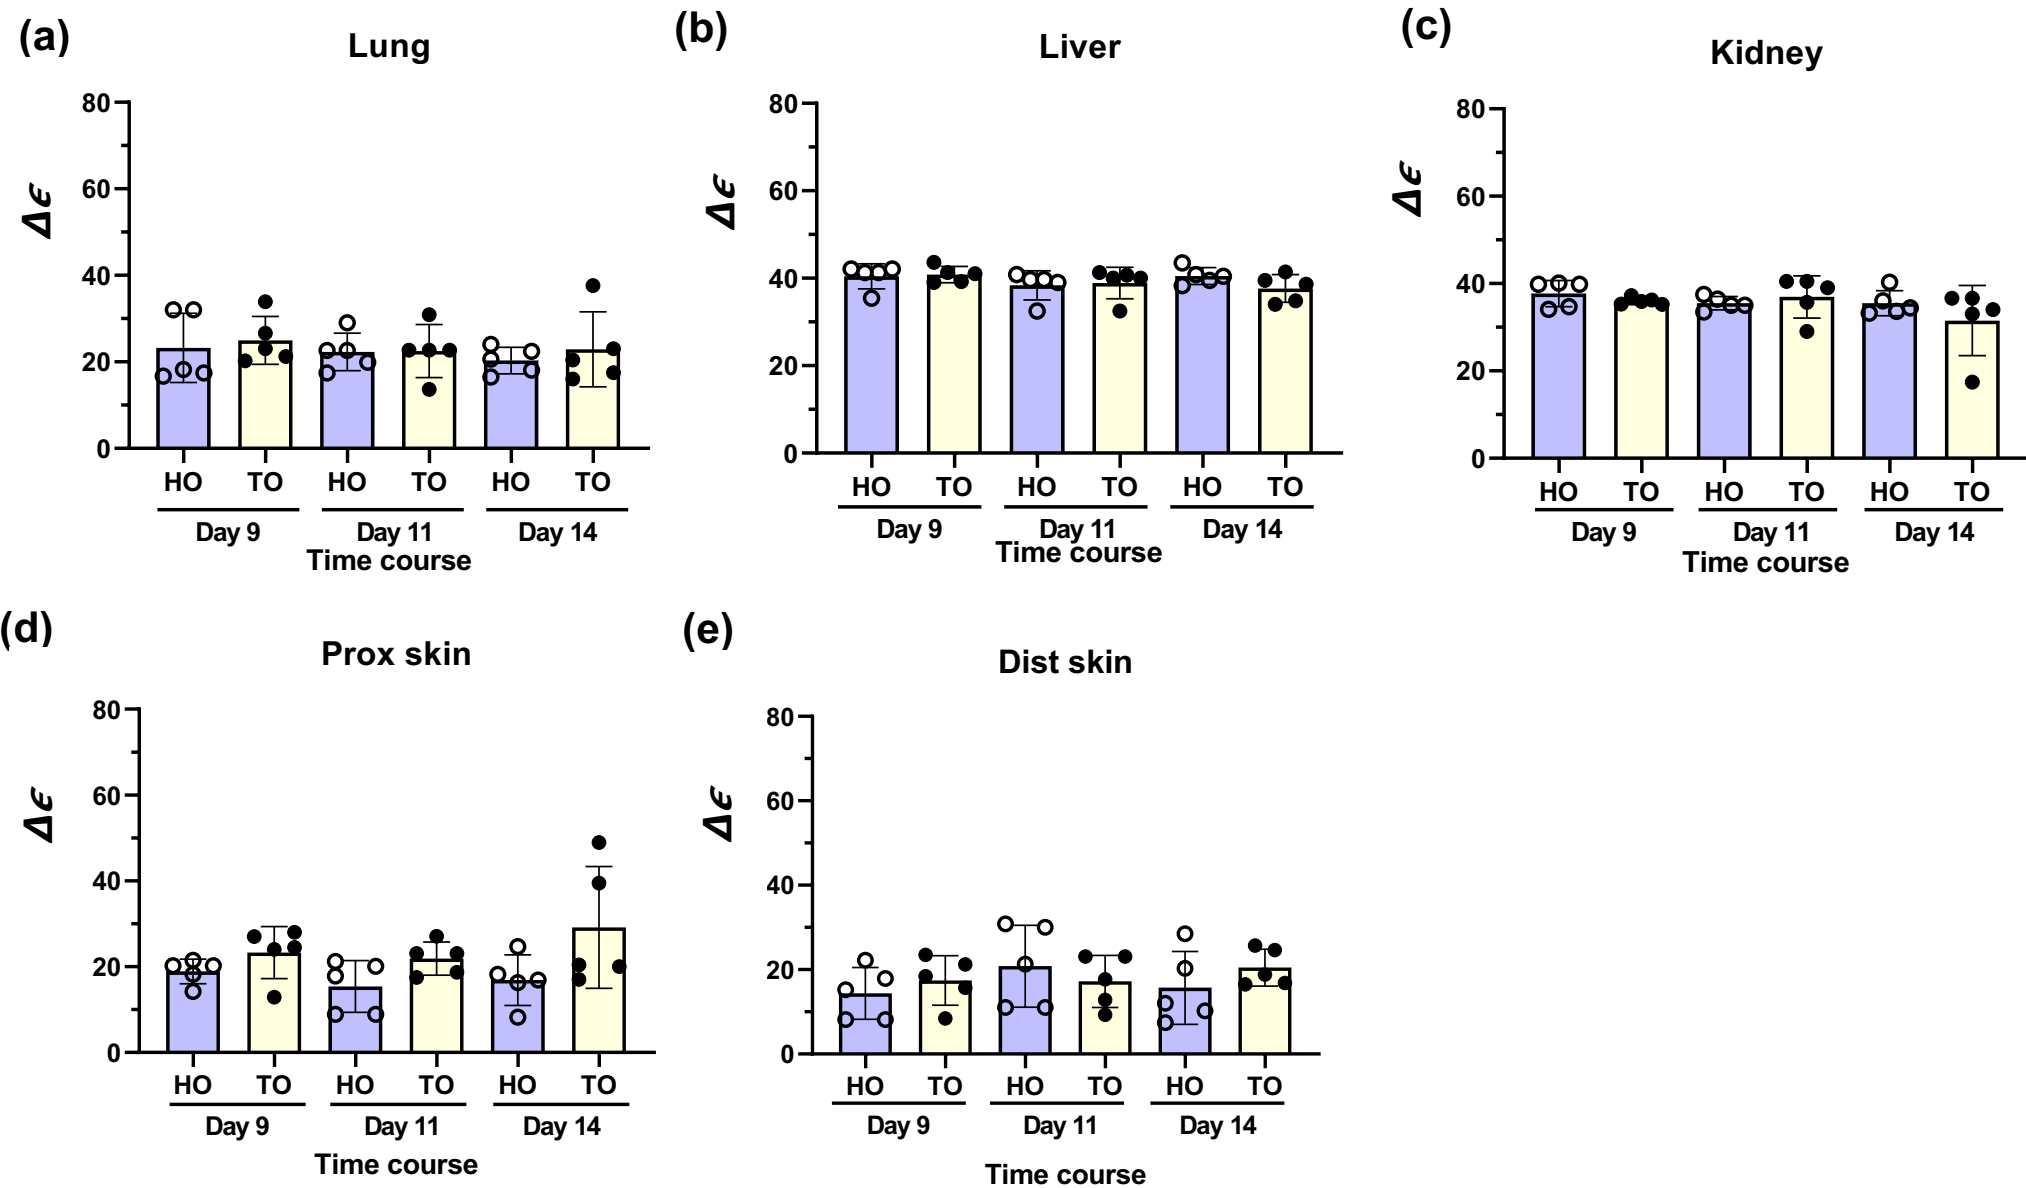

**Figure S7. The relaxation strength ( $\Delta\epsilon$ ) in each organ of healthy and tumor-bearing mice.**  
The graphs are presented as mean  $\pm$  SD. n=5 in HO or TO.

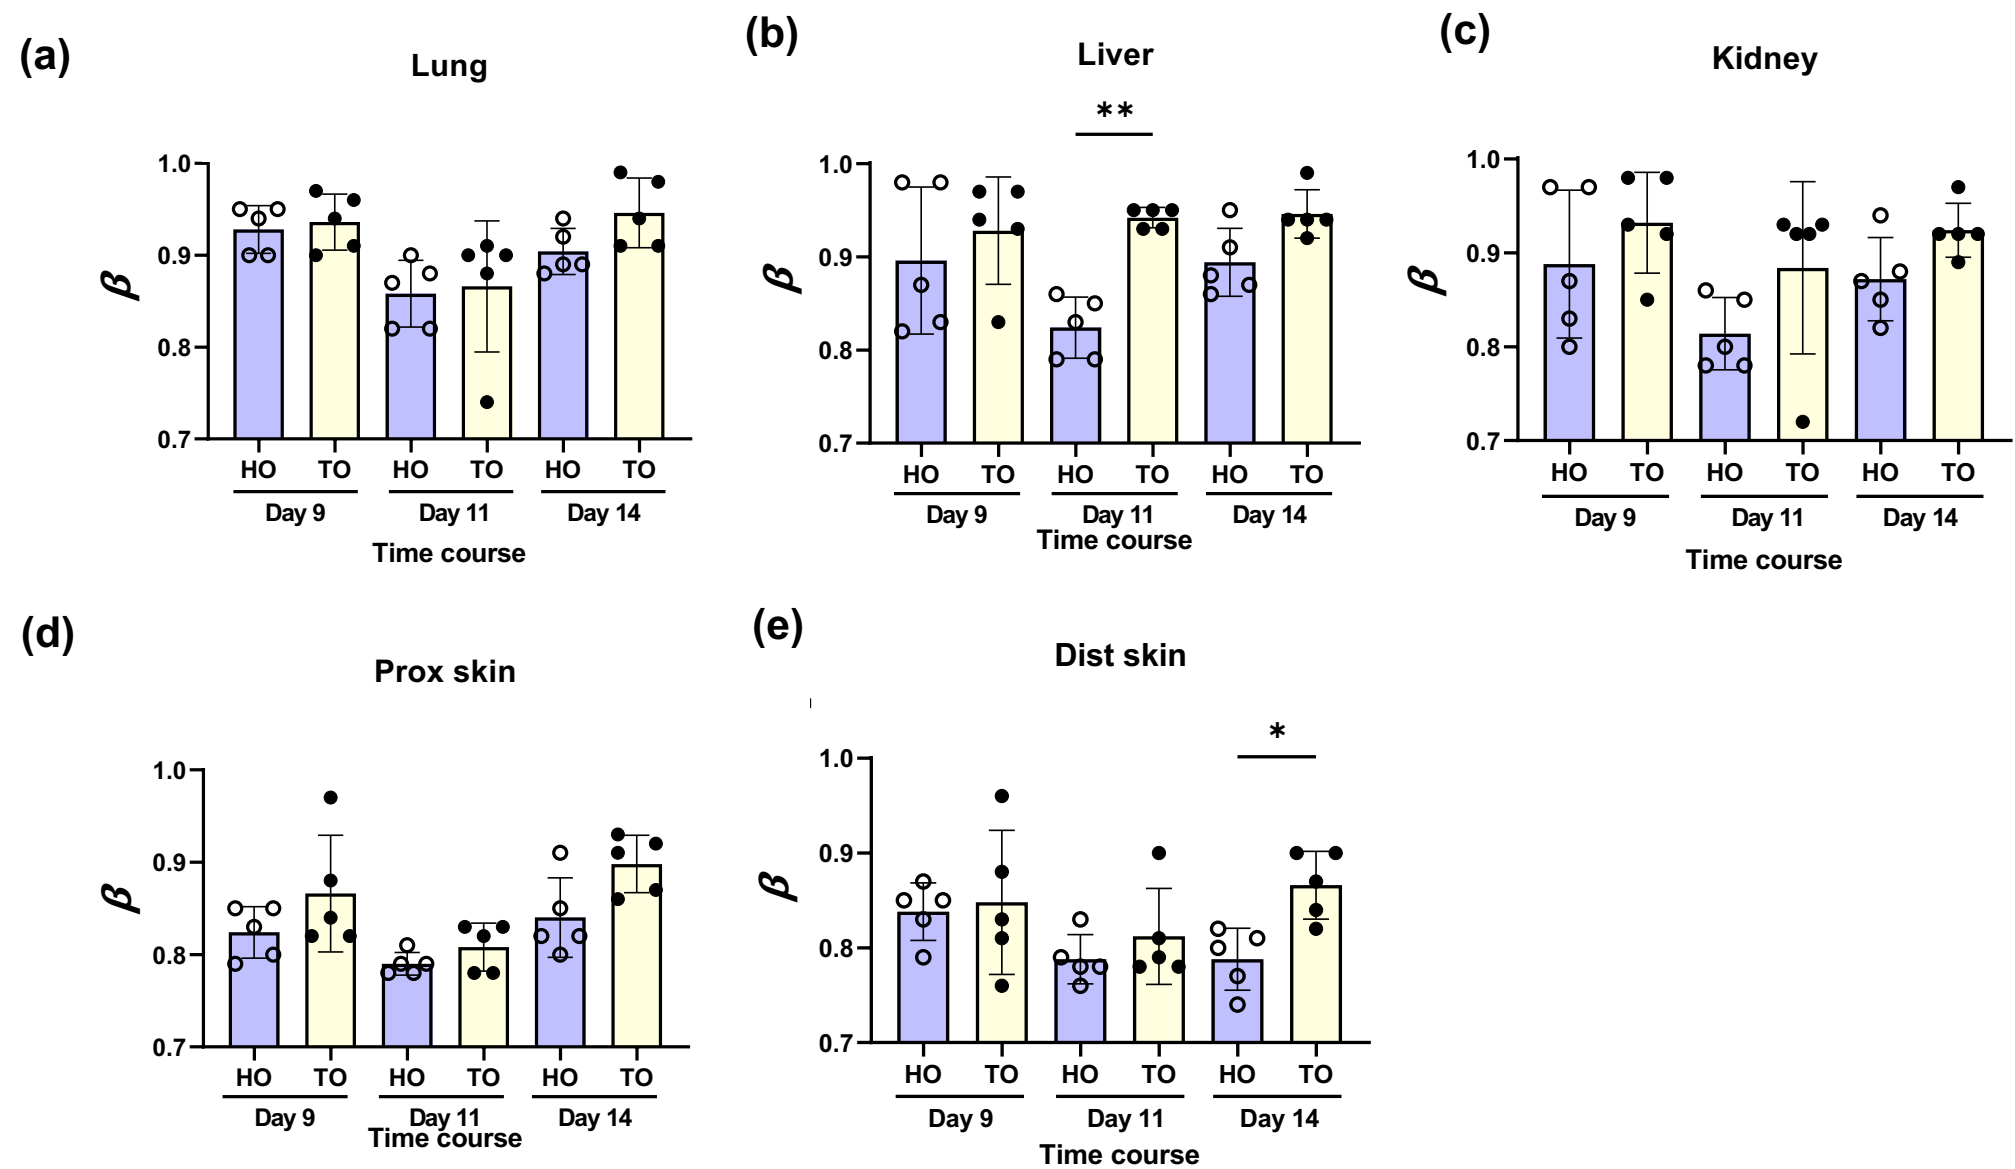

**Figure S8.** The relaxation time distribution parameter ( $\beta$ ) in each organ of healthy and tumor-bearing mice.

The graphs are presented as mean  $\pm$  SD.  $n=5$  in HO or TO. \* $p < 0.05$ , \*\* $p < 0.01$ .



**Table S1. Tumor sizes and weights during the observation period.**

| Tumor size (mm <sup>3</sup> ) |             |             | Tumor weight (g) |             |             |
|-------------------------------|-------------|-------------|------------------|-------------|-------------|
| Day 9                         | Day 11      | Day 14      | Day 9            | Day 11      | Day 14      |
| 301.8±123.6                   | 314.1±116.5 | 581.5±247.6 | 0.138±0.090      | 0.213±0.229 | 0.274±0.264 |

**Table S2. Water contents of tumor tissues and the organs in HO and TO.**

|        | Whole organs (%) |            | The other organs than skins (%) |            | Tumor (%)  |
|--------|------------------|------------|---------------------------------|------------|------------|
|        | HO               | TO         | HO                              | TO         |            |
| Day 9  | 67.4 ± 3.5       | 69.2 ± 6.0 | 69.6 ± 1.9                      | 70.1 ± 6.8 | 72.8 ± 6.6 |
| Day 11 | 67.6 ± 3.6       | 67.9 ± 7.5 | 69.2 ± 2.0                      | 67.6 ± 9.5 | 75.3 ± 3.7 |
| Day 14 | 68.3 ± 3.1       | 69.5 ± 3.0 | 69.8 ± 2.3                      | 70.1 ± 2.6 | 75.2 ± 4.3 |

**Table S3. Relaxation time (  $\tau$  ) of tumor tissues and the organs in HO and TO.**

|        | Whole organs (ps) |             | The other organs than skins (ps) |              | Tumor (ps)  |
|--------|-------------------|-------------|----------------------------------|--------------|-------------|
|        | HO                | TO          | HO                               | TO           |             |
| Day 9  | 9.39 ± 1.51       | 8.74 ± 1.25 | 9.48 ± 1.02                      | 9.15 ± 0.32  | 8.69 ± 0.75 |
| Day 11 | 9.22 ± 1.23       | 9.58 ± 1.30 | 9.40 ± 0.64                      | 9.60 ± 0.89  | 9.02 ± 0.67 |
| Day 14 | 8.87 ± 1.43       | 9.41 ± 2.33 | 9.08 ± 0.24                      | 10.08 ± 1.05 | 8.96 ± 0.99 |

**Table S4. Relaxation strength ( $\Delta\epsilon$ ) of tumor tissues and the organs in HO and TO.**

|        | Whole organs |             | The other organs than skins |            | Tumor      |
|--------|--------------|-------------|-----------------------------|------------|------------|
|        | HO           | TO          | HO                          | TO         |            |
| Day 9  | 27.0 ± 11.3  | 28.5 ± 9.7  | 33.7 ± 9.1                  | 33.9 ± 7.6 | 54.6 ± 4.3 |
| Day 11 | 26.5 ± 10.5  | 27.5 ± 10.0 | 32.0 ± 7.8                  | 32.8 ± 8.9 | 52.0 ± 3.0 |
| Day 14 | 25.8 ± 11.4  | 28.3 ± 10.1 | 32.1 ± 9.2                  | 30.7 ± 9.1 | 52.9 ± 9.7 |

**Table S5. Relaxation time distribution parameter (  $\beta$  ) of tumor tissues and the organs in HO and TO.**

|        | Whole organs  |               | The other organs than skins |               | Tumor         |
|--------|---------------|---------------|-----------------------------|---------------|---------------|
|        | HO            | TO            | HO                          | TO            |               |
| Day 9  | 0.876 ± 0.063 | 0.902 ± 0.065 | 0.911 ± 0.056               | 0.932 ± 0.045 | 0.956 ± 0.011 |
| Day 11 | 0.815 ± 0.038 | 0.862 ± 0.073 | 0.832 ± 0.039               | 0.897 ± 0.071 | 0.958 ± 0.023 |
| Day 14 | 0.860 ± 0.055 | 0.916 ± 0.043 | 0.890 ± 0.036               | 0.939 ± 0.031 | 0.962 ± 0.036 |

**Table S6. Water contents in each organ of HO and TO.**

|        | HO (%)           |                  |                  |                  |                  | TO (%)            |                  |                   |                  |                  |
|--------|------------------|------------------|------------------|------------------|------------------|-------------------|------------------|-------------------|------------------|------------------|
|        | Lung             | Liver            | Kidney           | Dist skin        | Prox skin        | Lung              | Liver            | Kidney            | Dist skin        | Prox skin        |
| Day 9  | 71.5<br>±<br>1.7 | 68.0<br>±<br>0.9 | 69.4<br>±<br>1.2 | 64.0<br>±<br>2.2 | 64.0<br>±<br>2.9 | 68.2<br>±<br>10.8 | 68.2<br>±<br>1.3 | 74.0<br>±<br>4.2  | 65.1<br>±<br>4.1 | 70.3<br>±<br>2.8 |
| Day 11 | 70.8<br>±<br>2.2 | 67.9<br>±<br>1.0 | 69.0<br>±<br>1.7 | 65.7<br>±<br>4.7 | 64.6<br>±<br>4.2 | 70.8<br>±<br>3.3  | 68.3<br>±<br>1.0 | 63.6<br>±<br>16.5 | 66.5<br>±<br>2.5 | 70.5<br>±<br>2.7 |
| Day 14 | 71.8<br>±<br>2.3 | 67.8<br>±<br>0.4 | 69.7<br>±<br>1.7 | 67.4<br>±<br>2.5 | 64.8<br>±<br>2.8 | 71.8<br>±<br>3.8  | 68.4<br>±<br>0.7 | 70.1<br>±<br>1.5  | 66.0<br>±<br>1.3 | 71.0<br>±<br>3.1 |

**Table S7. Relaxation time (  $\tau$  ) in each organ of HO and TO.**

|        | HO (ps)           |                   |                   |                   |                    | TO (ps)           |                    |                    |                    |                   |
|--------|-------------------|-------------------|-------------------|-------------------|--------------------|-------------------|--------------------|--------------------|--------------------|-------------------|
|        | Lung              | Liver             | Kidney            | Dist skin         | Prox skin          | Lung              | Liver              | Kidney             | Dist skin          | Prox skin         |
| Day 9  | 9.77<br>±<br>1.02 | 9.92<br>±<br>0.33 | 8.76<br>±<br>0.56 | 8.19<br>±<br>2.07 | 10.33<br>±<br>1.98 | 8.44<br>±<br>0.32 | 10.12<br>±<br>0.91 | 8.89<br>±<br>0.70  | 7.75<br>±<br>1.81  | 8.48<br>±<br>0.94 |
| Day 11 | 9.88<br>±<br>0.64 | 9.52<br>±<br>0.54 | 8.80<br>±<br>0.51 | 9.39<br>±<br>1.51 | 8.49<br>±<br>2.06  | 9.41<br>±<br>0.89 | 10.56<br>±<br>1.08 | 8.84<br>±<br>0.34  | 10.10<br>±<br>2.09 | 9.00<br>±<br>0.99 |
| Day 14 | 9.00<br>±<br>0.24 | 9.76<br>±<br>0.96 | 8.49<br>±<br>0.52 | 7.52<br>±<br>2.02 | 9.58<br>±<br>1.70  | 9.01<br>±<br>1.05 | 10.45<br>±<br>2.53 | 10.79<br>±<br>3.96 | 8.21<br>±<br>1.53  | 8.58<br>±<br>0.78 |

**Table S8. Relaxation strength ( $\Delta\epsilon$ ) in each organ of HO and TO.**

|        | HO                   |                      |                      |                      |                      | TO                   |                      |                      |                      |                       |
|--------|----------------------|----------------------|----------------------|----------------------|----------------------|----------------------|----------------------|----------------------|----------------------|-----------------------|
|        | Lung                 | Liver                | Kidney               | Dist<br>skin         | Prox<br>skin         | Lung                 | Liver                | Kidney               | Dist<br>skin         | Prox<br>skin          |
| Day 9  | 23.2<br>$\pm$<br>8.0 | 40.4<br>$\pm$<br>2.8 | 37.3<br>$\pm$<br>2.8 | 14.7<br>$\pm$<br>6.3 | 19.3<br>$\pm$<br>2.9 | 25.0<br>$\pm$<br>5.6 | 40.8<br>$\pm$<br>1.9 | 36.0<br>$\pm$<br>0.8 | 17.4<br>$\pm$<br>5.8 | 23.3<br>$\pm$<br>6.0  |
| Day 11 | 22.3<br>$\pm$<br>4.3 | 38.3<br>$\pm$<br>3.3 | 35.5<br>$\pm$<br>1.5 | 20.8<br>$\pm$<br>9.7 | 15.4<br>$\pm$<br>6.0 | 22.5<br>$\pm$<br>6.1 | 38.9<br>$\pm$<br>3.6 | 36.9<br>$\pm$<br>4.9 | 17.2<br>$\pm$<br>6.2 | 21.9<br>$\pm$<br>3.9  |
| Day 14 | 20.3<br>$\pm$<br>3.1 | 40.5<br>$\pm$<br>1.9 | 35.5<br>$\pm$<br>2.9 | 15.7<br>$\pm$<br>8.6 | 16.9<br>$\pm$<br>5.9 | 22.9<br>$\pm$<br>8.6 | 37.7<br>$\pm$<br>3.2 | 31.5<br>$\pm$<br>8.1 | 20.5<br>$\pm$<br>4.4 | 29.2<br>$\pm$<br>14.2 |

**Table S9. Relaxation time distribution parameter ( $\beta$ ) in each organ of HO and TO.**

|        | HO                      |                         |                         |                         |                         | TO                      |                         |                         |                         |                         |
|--------|-------------------------|-------------------------|-------------------------|-------------------------|-------------------------|-------------------------|-------------------------|-------------------------|-------------------------|-------------------------|
|        | Lung                    | Liver                   | Kidney                  | Dist<br>skin            | Prox<br>skin            | Lung                    | Liver                   | Kidney                  | Dist<br>skin            | Prox<br>skin            |
| Day 9  | 0.930<br>$\pm$<br>0.023 | 0.902<br>$\pm$<br>0.074 | 0.900<br>$\pm$<br>0.066 | 0.826<br>$\pm$<br>0.026 | 0.820<br>$\pm$<br>0.028 | 0.936<br>$\pm$<br>0.030 | 0.928<br>$\pm$<br>0.058 | 0.932<br>$\pm$<br>0.054 | 0.848<br>$\pm$<br>0.076 | 0.866<br>$\pm$<br>0.063 |
| Day 11 | 0.858<br>$\pm$<br>0.036 | 0.824<br>$\pm$<br>0.033 | 0.814<br>$\pm$<br>0.038 | 0.788<br>$\pm$<br>0.026 | 0.790<br>$\pm$<br>0.012 | 0.866<br>$\pm$<br>0.071 | 0.942<br>$\pm$<br>0.011 | 0.884<br>$\pm$<br>0.092 | 0.812<br>$\pm$<br>0.051 | 0.808<br>$\pm$<br>0.026 |
| Day 14 | 0.904<br>$\pm$<br>0.025 | 0.894<br>$\pm$<br>0.036 | 0.872<br>$\pm$<br>0.044 | 0.788<br>$\pm$<br>0.033 | 0.840<br>$\pm$<br>0.043 | 0.946<br>$\pm$<br>0.038 | 0.946<br>$\pm$<br>0.026 | 0.924<br>$\pm$<br>0.029 | 0.866<br>$\pm$<br>0.036 | 0.898<br>$\pm$<br>0.031 |
